# Supplementary material for: Ovulation induction drug and ovarian cancer: an updated systematic review and meta-analysis
Source: PubMed Central journal article supplement (PMC9872323; doi:10.1186/s13048-022-01084-z), 2023-01-24

Identification

Screening

Eligibility

Included

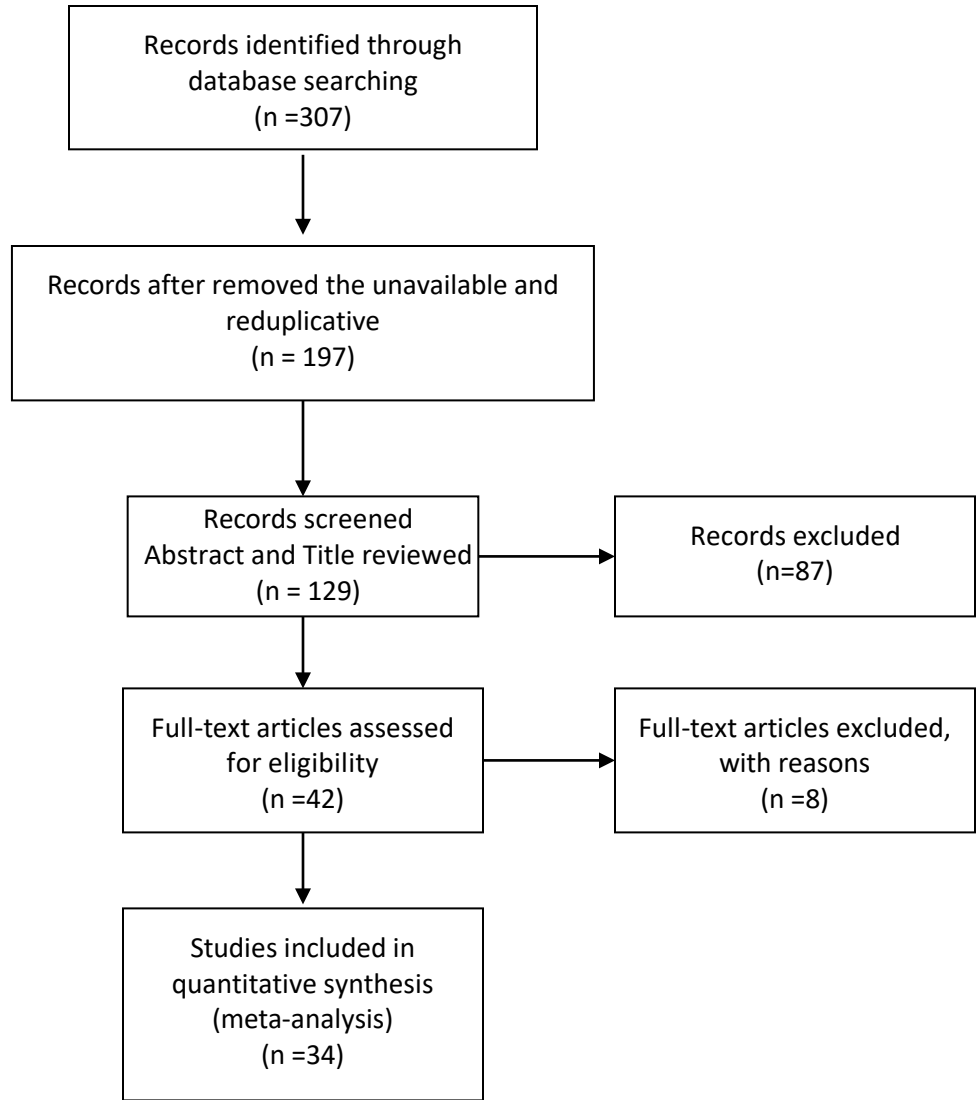

Supplement: 13048_2022_1084_MOESM1_ESM.pdf [file 13048_2022_1084_MOESM1_ESM.pdf]
